# Supplementary material for: Risk Factors for Excessive Gestational Weight Gain in a Healthy, Nulliparous Cohort
Source: Hindawi journal article supplement (doi:10.1155/2014/148391), 2014-01-01
Supplement: f1 [file 148391.f1.pdf]

**Supplementary Table 1A. Variables submitted to the model with *P* value <0.10**

| Variable Name                               | Variable Type                                  | Comments                                                                                                                                                                                  |
|---------------------------------------------|------------------------------------------------|-------------------------------------------------------------------------------------------------------------------------------------------------------------------------------------------|
| Centre                                      | 1 Adelaide<br>2 Cork<br>3 Auckland             | $P=<0.001$                                                                                                                                                                                |
| Body mass index groups (kg/m <sup>2</sup> ) | 1 18.5 - 24.9<br>2 25.0 - 29.9<br>3 $\geq 30$  | Data collected at 14-16 week SCOPE visit.<br>$P=<0.001$                                                                                                                                   |
| Age group (years)                           | 1 <25<br>2 25 - 29<br>3 30 - 34<br>4 $\geq 35$ | Data collected at 14-16 week SCOPE visit.<br>$P=0.013$                                                                                                                                    |
| Immigrant status                            | Yes<br>No                                      | Participant migration in the previous five years.<br>$P=0.076$                                                                                                                            |
| Education (years)                           | 1 <12<br>2 12 - 13<br>3 >13                    | Data collected at 14-16 week SCOPE visit.<br>$P=<0.001$                                                                                                                                   |
| Participant born preterm                    | Yes<br>No                                      | Participant born preterm (<37 weeks). Data was self-reported but women were asked to bring their 'birth record' if kept at home.<br>$P=0.003$ ; 0.92%; missing, imputed.                  |
| Fertility treatment                         | Yes<br>No                                      | Fertility treatment to conceive current pregnancy. Includes <i>in vitro</i> fertilisation, intra-cytoplasmic sperm injection, clomiphene or other hormonal treatment, donor oocyte, donor |

|                                            |                                                                |                                                                                                                         |
|--------------------------------------------|----------------------------------------------------------------|-------------------------------------------------------------------------------------------------------------------------|
|                                            |                                                                | sperm or artificial insemination.<br>$P= 0.032$                                                                         |
| Fish or seafood intake (servings per week) | 1 <3<br>2 ≥3                                                   | Includes servings of oily fish, other fish and seafood prior to 14 - 16 week SCOPE visit.<br>$P=0.002$                  |
| Folate at first visit                      | Yes<br>No                                                      | Any folate at 14 - 16 week SCOPE visit.<br>$P=0.001$                                                                    |
| Multivitamin in first trimester            | Yes<br>No                                                      | Any multivitamin intake in 1st trimester.<br>$P=0.024$                                                                  |
| Smoking status                             | 1 non-smoker<br>2 stopped during pregnancy<br>3 current smoker | Data collected at 14-16 week SCOPE visit.<br>$P=0.001$                                                                  |
| Recreational drug use in first trimester   | Yes<br>No                                                      | Consumed/inhaled/injected recreational drugs in the first trimester.<br>$P=0.044$                                       |
| Binge alcohol in first trimester           | Yes<br>No                                                      | Any binge alcohol in the first trimester.<br>$P=0.003$                                                                  |
| Exercise in pregnancy                      | 1 decreased<br>2 unchanged<br>3 increased                      | Change in exercise level in pregnancy. Data collected at 14-16 week SCOPE visit.<br>$P=0.001$ ; 0.31% missing, imputed. |
| Excess television viewing                  | Yes<br>No                                                      | Watching ≥5 hours/day. Data collected at 14-16 week SCOPE visit.<br>$P=0.079$                                           |

|                                          |                                    |                                                                                                                                                                 |
|------------------------------------------|------------------------------------|-----------------------------------------------------------------------------------------------------------------------------------------------------------------|
| Computer use in pregnancy                | Yes<br>No                          | Any computer usage in past month. Data collected at 14-16 week SCOPE visit.<br><i>P</i> =0.063                                                                  |
| Sleep duration on weekday nights (hours) | 1 <8<br>2 8-9<br>3 ≥10             | How many hours of sleeping at night on weekdays on average at 14 - 16 week SCOPE visit.<br><i>P</i> =0.004; 0.31% missing, imputed                              |
| Mother's birthweight (per 500g increase) | Continuous                         | Data was self-reported but women were asked to bring their 'birth record' if kept at home.<br><i>P</i> =<0.001; 4.15% missing, imputed                          |
| Limiting behaviour score                 | Continuous                         | The Limiting Behaviour score ranges from 0 to 20 with higher values corresponding with greater limiting behaviour.<br><i>P</i> =<0.001; 0.36% missing, imputed. |
| High leafy vegetable intake              | 1 <3 serves/day<br>2 ≥3 serves/day | High (≥3 times per day) green leafy vegetables consumption in pregnancy prior to 14 -16 week SCOPE visit.<br><i>P</i> =0.025                                    |
| Deep fried hot potato chip intake        | Yes<br>No                          | Any deep fried hot potato chip intake prior to 14 - 16 week SCOPE visit.<br><i>P</i> =0.005; 0.15% missing, not imputed.                                        |

**Supplementary Table 1B. Variables removed from the model with *P* value < 0.10**

| Variable Name                                                               | Variable Type                                                                                   | Comments                                                                                                                                          |
|-----------------------------------------------------------------------------|-------------------------------------------------------------------------------------------------|---------------------------------------------------------------------------------------------------------------------------------------------------|
| *Pre-pregnancy body mass index (kg/m <sup>2</sup> )                         | Continuous                                                                                      | Data collected at 14-16 week SCOPE visit and estimated according to IOM guidelines.<br><br><i>P</i> =<0.001                                       |
| *Pre-pregnancy body mass index (kg/m <sup>2</sup> )<br>(3 group categories) | 1 18.5 - 24.9<br>2 25.0 - 29.9<br>3 ≥30                                                         | Data collected at 14-16 week SCOPE visit.<br><br><i>P</i> =<0.001                                                                                 |
| *Body mass index (kg/m <sup>2</sup> )                                       | Continuous                                                                                      | Data collected at 14-16 week SCOPE visit.<br><br><i>P</i> =<0.001                                                                                 |
| *Pre-pregnancy body mass index (kg/m <sup>2</sup> )<br>(4 group categories) | 1 <18.5 underweight<br>2 ≥18.5 and <25 normal weight<br>3 ≥25 and <30 overweight<br>4 ≥30 obese | Data collected at 14-16 week SCOPE visit and categorized into 4 groups according to World Health Organization criteria. .<br><br><i>P</i> =<0.001 |
| *Weight (kg)                                                                | Continuous                                                                                      | Data collected at 14-16 week SCOPE visit.<br><br><i>P</i> =<0.001                                                                                 |
| *Estimated pre-pregnancy weight (kg)                                        | Continuous                                                                                      | Data collected at 14-16 week SCOPE visit and estimated according to IOM guidelines.<br><br><i>P</i> =<0.001                                       |
| *Height (cm)                                                                | Continuous                                                                                      | Data collected at 14-16 week SCOPE visit.<br><br><i>P</i> =<0.001                                                                                 |
| *Height < 161 cm                                                            | Yes                                                                                             | Short stature (< 161 cm).                                                                                                                         |

|                                                             |                                                       |                                                                                                                    |
|-------------------------------------------------------------|-------------------------------------------------------|--------------------------------------------------------------------------------------------------------------------|
|                                                             | No                                                    | $P = < 0.001$                                                                                                      |
| * +Waist circumference (cm)                                 | Continuous                                            | Data collected at 14-16 week SCOPE visit<br>$P = < 0.001$                                                          |
| * +Waist $\geq 94$ cm                                       | Yes<br>No                                             | Large waist $\geq 94$ cm. Data collected at 14-16 week SCOPE visit.<br>$P = 0.025$                                 |
| *+Waist to height ratio                                     | Continuous                                            | Data collected at 14-16 week SCOPE visit.<br>$P = 0.005$                                                           |
| *Arm circumference (cm)                                     | Continuous                                            | Mid upper arm circumference at 14-16 week SCOPE visit.<br>$P = < 0.001$                                            |
| *Participant birthweight group (4 group categories)         | 1 <1500g<br>2 1500-2499g<br>3 2500-3499g<br>4 >-3500g | Participant's birthweight divided into categories.<br>$P = < 0.001$                                                |
| *In vitro fertilization                                     | Yes<br>No                                             | In vitro fertilization to conceive in current pregnancy.<br>$P = 0.007$                                            |
| *Intracytoplasmic sperm injection                           | Yes<br>No                                             | Intracytoplasmic sperm injection to conceive in current pregnancy.<br>$P = 0.021$                                  |
| *In vitro fertilization or intracytoplasmic sperm injection | Yes<br>No                                             | Either in vitro fertilization or intracytoplasmic sperm injection to conceive in current pregnancy.<br>$P = 0.019$ |
| *Oily fish                                                  | 1 Often ( $\geq 3$ x per                              | Frequency consumed oily fish                                                                                       |

|                                                               |                                                                                                                |                                                                                                                                                                                                       |
|---------------------------------------------------------------|----------------------------------------------------------------------------------------------------------------|-------------------------------------------------------------------------------------------------------------------------------------------------------------------------------------------------------|
| consumption<br>(2 group categories)                           | week)<br>2 Moderate (1-2x per week) or Rarely                                                                  | (which is high in omega 3 long chain fatty acids) in pregnancy prior to 15w SCOPE visit, 2 severity grades. Deleted as overlapped with similar variable<br><br>$P=0.007$                              |
| *Oily fish consumption<br>(3 group categories)                | 1 Often ( $\geq 3x$ per week)<br>2 Moderate (1-2x per week)<br>3 Rarely ( $\leq 3x$ per month)                 | Frequency consumed oily fish (which is high in omega 3 long chain fatty acids) in pregnancy prior to 15w SCOPE visit, 3 severity grades. Deleted as overlapped with similar variable<br><br>$P=0.030$ |
| *High oily fish consumption                                   | Yes<br>No                                                                                                      | High consumption oily fish (which is high in omega 3 long chain fatty acids) $\geq 3$ times a week in pregnancy prior to 15w SCOPE visit.<br><br>$P=0.009$                                            |
| *Other fish consumption pre-pregnancy<br>(8 group categories) | 1 Never<br>2 1-3/mth<br>3 1 or 2/wk<br>4 3 or 4/wk<br>5 5 or 6/wk<br>6 1-2/day<br>7 3-4/day<br>8 $\geq 5$ /day | Frequency consumed other fish (excludes oily fish) or seafood in the month prior to conception.<br><br>$P=0.072$                                                                                      |
| *High other fish consumption pre-pregnancy                    | Yes<br>No                                                                                                      | Consumption of other fish (excludes oily fish) or seafood $\geq 3$ times a week in the month prior to conception.<br><br>$P=0.085$                                                                    |
| *Green leafy                                                  | 1 Never                                                                                                        | Frequency consumed green                                                                                                                                                                              |

|                                                                           |                                                                                                                                                        |                                                                                                              |
|---------------------------------------------------------------------------|--------------------------------------------------------------------------------------------------------------------------------------------------------|--------------------------------------------------------------------------------------------------------------|
| vegetables pre-pregnancy<br>(8 group categories)                          | 2 1-3/mth<br>3 1 or 2/wk<br>4 3 or 4/wk<br>5 5 or 6/wk<br>6 1-2/day<br>7 3-4/day<br>8 $\geq 5$ /day                                                    | leafy vegetables in the month prior to conception.<br><br>$P=0.079$                                          |
| *High folate intake in 1 <sup>st</sup> trimester                          | 1 Not taking folate<br>2 Yes $\leq 800$<br>3 Yes $>800$                                                                                                | Folate dose by $\leq 800\mu\text{g}$ and $>800\mu\text{g}$ per day in 1st trimester.<br><br>$P=0.084$        |
| *High folate intake at 14-16 weeks visit<br>(3 group categories)          | 1 Not taking folate<br>2 Yes $\leq 800$<br>3 Yes $>800$                                                                                                | Folate dose by $\leq 800\mu\text{g}$ and $>800\mu\text{g}$ per day at 15w SCOPE visit.<br><br>$P=0.001$      |
| *Multivitamin intake in 1 <sup>st</sup> trimester<br>(3 group categories) | 1 No<br>2 Less than daily<br>3 Daily                                                                                                                   | Frequency of multivitamin intake in 1st trimester.<br><br>$P=0.015$                                          |
| *Any multivitamin intake at 14-16 weeks visit                             | Yes<br>No                                                                                                                                              | Any multivitamin intake at 15w SCOPE visit.<br><br>$P=0.041$                                                 |
| *Smoking status at 14-16 week visit<br>(4 group categories)               | 1 Never smoked<br>2 Smoked pre-preg, but quit smoking before pregnant<br>3 Smoked in preg, but quit smoking before 1st visit<br>4 Smoking at 1st visit | Smoking status at 15w SCOPE visit in 4 groups (pre-pregnancy and pregnancy smoking status).<br><br>$P=0.004$ |
| *Cigarettes per day 1 <sup>st</sup> trimester                             | Continuous                                                                                                                                             | Number of cigarettes per day in the 1st trimester.<br><br>$P=0.097$                                          |
| *Cigarette exposure prior to 14-16 week                                   | 1 No smoking<br>2 1-12wk                                                                                                                               | Number of weeks of cigarette exposure in pregnancy prior to                                                  |

|                                                                   |                                                                                                                                                           |                                                                                                                             |
|-------------------------------------------------------------------|-----------------------------------------------------------------------------------------------------------------------------------------------------------|-----------------------------------------------------------------------------------------------------------------------------|
| visit<br>( 3 group categories)                                    | 3 >12wk                                                                                                                                                   | 15w SCOPE visit (categories).<br><br>$P=0.005$                                                                              |
| *Cigarettes per day at 14-16 week visit                           | Continuous                                                                                                                                                | Number of cigarettes per day at 14-16 week SCOPE visit.<br><br>$P=0.064$                                                    |
| *Smoked in 1 <sup>st</sup> trimester                              | Yes<br>No                                                                                                                                                 | Smoked during the 1st trimester.<br><br>$P=0.056$                                                                           |
| *Alcohol intake pre-pregnancy<br>(5 group categories)             | 1 No alcohol<br>2 1-2<br>3 3-7<br>4 8-14<br>5 >14                                                                                                         | Units of alcohol per week in the 3 months pre-pregnancy (5 categories).<br><br>$P=0.004$                                    |
| *Alcohol intake pre-pregnancy<br>(3 group categories)             | 1 No Alcohol<br>2 Low Alcohol consumption ( $\leq 2$ units/day or $\geq 14$ units/week)<br>3 High Alcohol consumption ( $>2$ units/day or $>14$ units/wk) | Units of alcohol per week in the 3 months pre-pregnancy divided into 3 grades of severity.<br><br>$P=0.052$                 |
| *Alcohol intake 1 <sup>st</sup> trimester<br>(5 group categories) | 0 No alcohol<br>1 1-2<br>2 3-7<br>3 8-14<br>4 >14                                                                                                         | Units of alcohol per week in the 1st trimester (5 categories).<br><br>$P=0.065$                                             |
| *Any recreational drug use in 1 <sup>st</sup> trimester           | Yes<br>No                                                                                                                                                 | Consumed/inhaled/injected other recreational drugs in the 1st trimester combining 'unknown' (n=0) with No.<br><br>$P=0.042$ |
| *Gestation ceased recreational drug use                           | 1 No other drugs taken<br>2 1-12 weeks                                                                                                                    | Gestation ceased other recreational drugs                                                                                   |



|                                                                    |                                                                                                          |                                                                                                                          |
|--------------------------------------------------------------------|----------------------------------------------------------------------------------------------------------|--------------------------------------------------------------------------------------------------------------------------|
| (3 group categories)                                               | 3 >12 weeks                                                                                              | (categories).<br><br>$P=0.019$                                                                                           |
| *Any marijuana use<br>1 <sup>st</sup> trimester                    | Yes<br>No                                                                                                | Used any marijuana in the 1st trimester.<br><br>$P=0.098$                                                                |
| *Any marijuana use at<br>14-16 week visit                          | Yes<br>No                                                                                                | Any use of marijuana during pregnancy at 14-16 week visit.<br><br>$P=0.098$                                              |
| *Exercise/gardening<br>at 14-16 week visit                         | Continuous                                                                                               | Hours exercising/gardening per week evaluated at 14-16 week visit.<br><br>$P=0.018$                                      |
| *Exercise/gardening<br>at 14-16 week visit<br>(7 group categories) | 0 No<br>exercise/gardening<br>1 1 hour<br>2 2 hours<br>3 3 hours<br>4 4 hours<br>5 5 hours<br>6 6≥ hours | Hours exercising/gardening per week evaluated at 14-16 week visit by 7 categories.<br><br>$P=0.009$                      |
| *Climbing stairs per<br>day<br>(3 group categories)                | 1 Never<br>2 <10x/day<br>3 ≥10x/day                                                                      | Number of times climbed stairs in the last month, evaluated at 15w SCOPE visit.<br><br>$P=0.028$                         |
| *Limiting behaviour<br>>90 <sup>th</sup> centile                   | Yes<br>No                                                                                                | Behavioural response to pregnancy: Limiting Behaviour Score evaluated at 15w SCOPE visit >90th Centile.<br><br>$P=0.003$ |
| *All or None<br>Behaviour Score                                    | Continuous                                                                                               | Behavioural response to pregnancy: All or None Behaviour Score evaluated at 15w SCOPE visit: All or None                 |

|                                           |            |                                                                                                    |
|-------------------------------------------|------------|----------------------------------------------------------------------------------------------------|
|                                           |            | Behaviour Score.<br>$P=0.049$                                                                      |
| *Sleep duration on weekday nights (hours) | Continuous | How many hours of sleeping at night on weekdays on average at 14-16 week SCOPE visit.<br>$P=0.002$ |

\* Deleted as overlapped with similar variable already in the model.

† Deleted as difficult to replicate in future clinical practice.
